# Supplementary material
Source: bioRxiv or medRxiv preprint supplement (https://www.biorxiv.org/highwire/filestream/109596/field_highwire_adjunct_files/1/362293-2.pdf)
Supplement: Supplementary file [file 362293-2.pdf]

1           **Protein Deacetylase CobB Interplays with c-di-GMP**

2   Zhaowei Xu<sup>+</sup>, Hainan Zhang<sup>+</sup>, Xingrun Zhang<sup>+</sup>, Chengxi Liu, Hwei Jiang,  
3   Fanlin Wu, Lili Qian, Daniel M. Czajkowsky, Shujuan Guo, Lijun Bi, Shihua  
4   Wang, Haitao Li, Minjia Tan, Lei Feng, Jingli Hou, Sheng-ce Tao\*

5

6

7   \* Correspondence address. Email: taosc@sjtu.edu.cn (S.C.-Tao)

8   <sup>+</sup>These authors contributed equally to this work

9

10

11

12

13

14

15

16

17

18

19

20

21

22

23 **Supplemental results**

24 **Determine the binding affinity of *S. typhimurium* CobB with c-di-GMP**

25 To determine the binding affinity of *Salmonella* CobB with c-di-GMP, we  
26 performed the ITC and biolayer interference assay (BLI) assay. As shown  
27 in the binding curves of ITC, the former 8 injections show a consecutive  
28 increase in caloricity release that indicate a protein conformation or  
29 oligomer-state change, while their interaction is revealed by the  
30 remaining injections which show a successive decrease. Elution volume  
31 in gel filtration exhibits a highly aggregated protein form, and  
32 asymmetric UV absorption curve indicates its poly-conformational state,  
33 which are consistent with properties of the ITC binding curve  
34 **(Supplementary Fig. 10a and 10b)**. Hence, the depolymerization of  
35 *Salmonella* CobB would release caloricity and affect the ITC result.  
36 Because of this, we re-analyzed the affinity of *Salmonella* CobB for  
37 c-di-GMP using BLI that does not depend on caloricity change. In BLI  
38 assay, we determined two affinity constants of c-di-GMP/CobB 15.5  $\mu$ M  
39 and 15.6 nM **(Supplementary Fig. 10c)**, possibly because *Salmonella*  
40 CobB have diversified state of multimer. Additionally, in *E. coli* and  
41 *Salmonella* CobB, the c-di-GMP binding sites *i.e.*, R8, R17, E21 are  
42 consistent, hence, we speculated that the *E. coli* and *Salmonella* CobB  
43 have similar affinity with c-di-GMP. Therefore, 15.5  $\mu$ M is more likely to  
44 be the affinity constant of c-di-GMP to *Salmonella* CobB.

45

## 46 **Supplemental methods**

### 47 **MST assay**

48 We used the Cy3 label kit (GE Healthcare, Pittsburgh, USA) to label the  
49 purified CobB (0.5 mg/mL, 16.13  $\mu$ M) and used desalt spin columns  
50 (Pierce, MA, USA) for removing free dye. Microscale Thermophoresis  
51 assay (MST assay)<sup>1</sup> is a method by measuring the molecular movement  
52 in micro-temperature gradient field to assay the moleculars' interaction.  
53 In MST assay, the serially diluted c-di-GMP, *i.e.*, 0.49, 0.97, 1.95, 3.91,  
54 7.81, 15.63, 32.25, 62.50, 125 and 250  $\mu$ M were incubated with 0.1  
55 mg/mL (3.23  $\mu$ M) of Cy3-labeled CobB in 20  $\mu$ L deacetylation buffer for 5  
56 minutes. The sample was loaded into the NanoTemper glass capillaries  
57 (NanoTemper, München, Germany) and micro-thermophoresis was  
58 carried out using 40% LED power and 80% MST laser power to producing  
59 a local temperature gradient. The  $K_d$  were calculated using the mass  
60 action equation via the NanoTemper software (NanoTemper, München,  
61 Germany) from duplicate reads of triplicate experiments.

62

### 63 **Biolayer Interference (BLI) assay**

64 BLI assay is a method based on the Biolayer interference principle to  
65 assay the moleculars' interaction, and performed as described  
66 previously<sup>2</sup>. 50  $\mu$ g/mL (42.6  $\mu$ M) biotin-c-di-GMP was loaded on

67 streptavidin (SA) tips (ForteBio/Pall Life Sciences, CA, USA) for 300 s.  
68 His-CobB<sup>S. typhimurium</sup> was prepared with serial dilution (31.25, 62.5, 125,  
69 250, 500, 1000 and 2500 nM) and bound to the c-di-GMP-saturated tips  
70 for 600 s and then dissociated in the buffer (1xPBS, 0.02% tween20, 0.1%  
71 BSA) for 600 s. The results were recorded and processed by Octet  
72 Software v7.x from ForteBio system (ForteBio/Pall Life Sciences, CA,  
73 USA).

74

75

#### 76 **Supplemental figure legends**

77 **Supplementary Figure 1. ITC titration curves of wild-type CobB titrated**  
78 **with c-di-GMP, cGMP and c-di-AMP, and mutant CobB R8A, R17A and**  
79 **E21A titrated with c-di-GMP.** The titration curves of wild-type CobB  
80 protein titrated with 1.5 mM c-di-GMP (a), cGMP (b) and c-di-AMP (c)  
81 are shown in blue. The titration curves of mutant CobB R8A (d), R17A (e)  
82 and E21A (f) protein titrated with c-di-GMP also are shown in blue. All  
83 control curves of titrated buffer titrated with ligands used in curve fitting  
84 of each titration assays are colored in black.

85

86 **Supplementary Figure 2. The binding of c-di-GMP and CobB was**  
87 **confirmed by MST analysis.** Serially diluted c-di-GMP, *i.e.*, from 0.1  $\mu$ M  
88 to 50 mM were incubated with 0.1 mg/mL (3.23  $\mu$ M) of

89 fluorescently-labeled CobB **(a)** and equal cGMP was included as negative  
90 controls **(b)** The binding was determined by micro-thermophoresis in 40 %  
91 LED power and 80 % laser power. The fluorescent coefficients and  
92 substrate concentrations were fitted to a curve to determine the  $K_d$  and  
93 their associated errors, using the NanoTemper software.

94

95 **Supplementary Figure 3. The polymer states of CobB and CobB<sub>5</sub>. (a)** The  
96 polymer states of CobB and CobB<sub>5</sub> were determined by molecular sieve.  
97 CobB and CobB<sub>5</sub> were determined by OD<sub>260</sub> (red curve) and OD<sub>280</sub> (blue  
98 curve). **(b)** The polymer states of CobB and CobB<sub>5</sub> were determined by  
99 SDS-PAGE after cross-linking.

100

101 **Supplementary Figure 4. c-di-GMP inhibits CobB deacetylase activity in**  
102 **vitro. (a)** CobB activity assay was performed using Acs as substrate. The  
103 loss of the acetylation level of Acs indicates the CobB's deacetylase  
104 activity and it was detected by the pan anti-acetyl antibody. (three  
105 preparations;  $**P < 0.01$ , two-tailed Student's t-test). CobB activity assay  
106 was also performed using CheY **(b)** (three preparations;  $*P < 0.05$ ,  
107 two-tailed Student's t-test), and NhoA **(c)** (three preparations;  $**P < 0.01$ ,  
108 two-tailed Student's t-test) as substrate.

109

110 **Supplementary Figure 5. The growth curves of the 6 strains were**

111 **determined.** These bacterial strains were cultured in the Vogel-Bonner  
112 medium with 30 mM acetate **(a)** or 30 mM **(b)** propionate and the  
113 growth was measured at 8, 12, 16, 20, 24 and 32 h.

114

115 **Supplementary Figure 6. The mass spectra of representative peptide in**  
116 **the SILAC experiment. (a, b)** The mass spectra show high light (*ydeH*<sup>+</sup>)  
117 signal and significant low heavy (WT) signal for 2 peptides. **(c, d)** The  
118 mass spectra show high light signal vs undetectable heavy signal for  
119 another 2 peptides.

120

121 **Supplementary Figure 7. The Gene Ontology (GO) analysis of the**  
122 **c-di-GMP-upregulated (a) and the known CobB-regulated acetylated**  
123 **proteins (b).** The ordinates show the functional classification, and the  
124 histogram show protein amounts in each group (blue) and the fold  
125 enrichment (red).

126

127 **Supplementary Figure 8. c-di-GMP blinds to CobB mutants. (a)** The  
128 c-di-GMP concentration of the 5 strains are determinate by UPLC-IM-MS  
129 with three replicates. **(b-d)** The growth curves of the 5 strains were  
130 determined. These bacterial strains were cultured in the Vogel-Bonner  
131 medium with 10 mM propionate **(b)**, 30 mM acetate **(c)** or 30 mM  
132 propionate **(d)** and the growth was measured at 8, 12, 16, 20, 24 and 32

133 h with three replicates.

134

135 **Supplementary Figure 9. The evolutionary tree of CobB.** CobB protein  
136 sequences of a list of representative bacteria were downloaded from  
137 NCBI and aligned using CLUSTALW from EMBL-EBI.

138

139 **Supplementary Figure 10. c-di-GMP binds *S. typhimurium* CobB *in vitro*.**

140 **(a)** ITC analysis of the binding of c-di-GMP and *S. typhimurium* CobB. The  
141 titration curves of *S. typhimurium* CobB titrated with 1.5 mM c-di-GMP is  
142 shown in blue and the buffer titrated with ligand is colored in black. **(b)**  
143 Gel filtration assay of *S. typhimurium* CobB. The observed protein size is  
144 608KDa. **(c)** BLI assay of the affinity of *S. typhimurium* CobB and c-di-GMP.  
145 The BLI assay were assay under different CobB concentrations (31.5 to  
146 2,500 nM).

147

148 **Supplementary Figure 11. MS analysis to determine the K170 (a) and**  
149 **K277 (b) acetylation of YdeH that could be deacetylated by CobB.**

150

151 **Supplementary Figure 12. LC-MS analysis to determine the acetylation**  
152 **sites on Era (a) and YegE (b).**

153

154 **Supplementary Figure 13.** The protein stability of overexpressed YdeH

155 mutants. After incubation, these samples were centrifuged at 12,000 g  
156 for 10 min to separate precipitation. These samples were separated at  
157 0.5 h, 1.5h and 2.5 h and the protein levels were determined by the  
158 anti-His antibody. The bar graph showed the quantitation of the protein  
159 level of YdeH with three replicates.

160

161 **Supplementary Figure 14. The K4 acetylation stoichiometry of**  
162 **overexpressed and affinity purified YdeH.** The mass spectra show AQUA  
163 quantification of the acetylation of overexpressed YdeH K4 using AQUA  
164 peptide.

165

166 **Supplementary Figure 15.** The drop in soluble YdeH (shown in Fig 7d) is  
167 well described according to a simple exponential decay.

168

169 **Supplementary Figure 16. The K4 acetylation stoichiometry of**  
170 **endogenous YdeH in stationary growth.** The mass spectra show AQUA  
171 quantification of endogenous YdeH K4 acetylation of WT cells **(a)** and  
172 CobB defect cells **(b)**. **(c)** The level of the endogenous YdeH in  
173 supernatant and sediment. The protein levels were determined by the  
174 anti-FLAG antibody and GroEL was applied as the loading control. The  
175 bar graph showed the quantitation of the protein level of supernatant  
176 YdeH with three replicates.



177

178 **Supplementary Figure 17. The model of YdeH K4 acetylation reducing**  
179 **the DGC activity directly. (a)** The *E.coli* YdeH structure and K4 residue  
180 was highlighted in red. YdeH dimer are distinguished by color (PDB code:  
181 4H54). **(b)** Structure of the GGDEF dimer and two GTP $\alpha$ S substrates are  
182 not in reacting distance (red arrows) leads to explain the misalignment.  
183 **(c)** Structure of a catalytically competent GGDEF/GTP dimer. Two GGDEF  
184 domains have been shifted into the reaction orientation. **(d)** Mechanistic  
185 model of YdeH activity regulation by K4-dependent structure alignment.

186

187 **Supplementary Table 1. The statistical analysis results ( $p$  value).** The  
188 statistical analysis results of growth curves at 8 h or 24 h in Fig. 2f. (three  
189 preparations; two-tailed Student's t-test).

190

191

## 192 **References**

- 193 1. Wienken, C.J., Baaske, P., Rothbauer, U., Braun, D. & Duhr, S. Protein-binding  
194 assays in biological liquids using microscale thermophoresis. *Nature Communications*  
195 **1** (2010).
- 196 2. Zhang, H.-N. *et al.* Cyclic di-GMP regulates Mycobacterium tuberculosis resistance to  
197 ethionamide. *Scientific Reports* **7** (2017).

198
